# Supplementary material for: Catalytic inhibitors of DNA topoisomerase II suppress the androgen receptor signaling and prostate cancer progression
Source: PubMed Central journal article supplement (PMC4653019; doi:10.18632/oncotarget.4105), 2015-05-12
Supplement: oncotarget-06-20474-s001.pdf [file oncotarget-06-20474-s001.pdf]

# Catalytic inhibitors of DNA topoisomerase II suppress the androgen receptor signaling and prostate cancer progression

## Supplementary Material

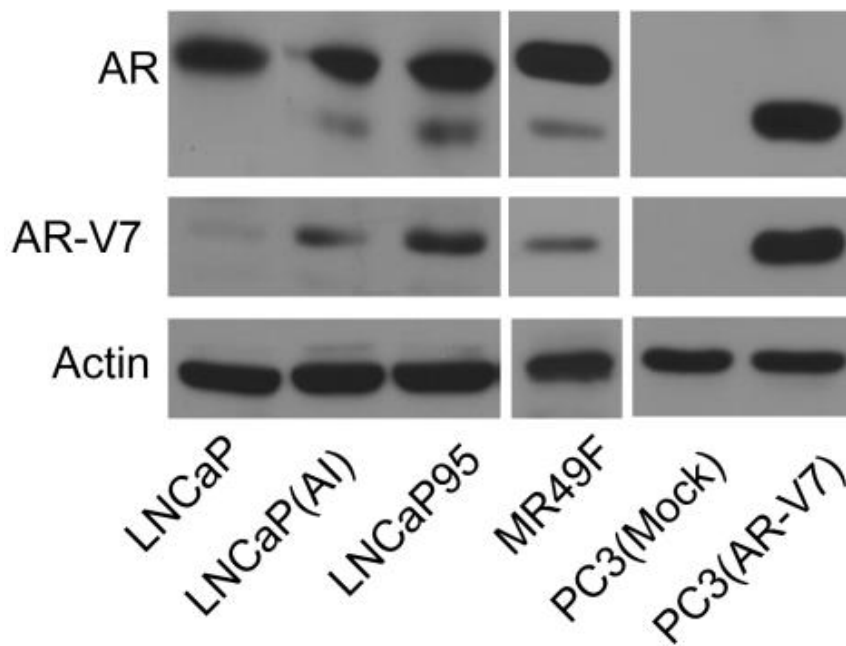

**Figure S1:** AR and AR-V7 protein levels in LNCaP, LNCaP(AI), LNCaP95, MR49F, PC3(mock) and PC3(AR-V7) cell lines were detected by Western blotting with AR (N-20) and AR-V7 antibodies. Beta actin was used as loading control.

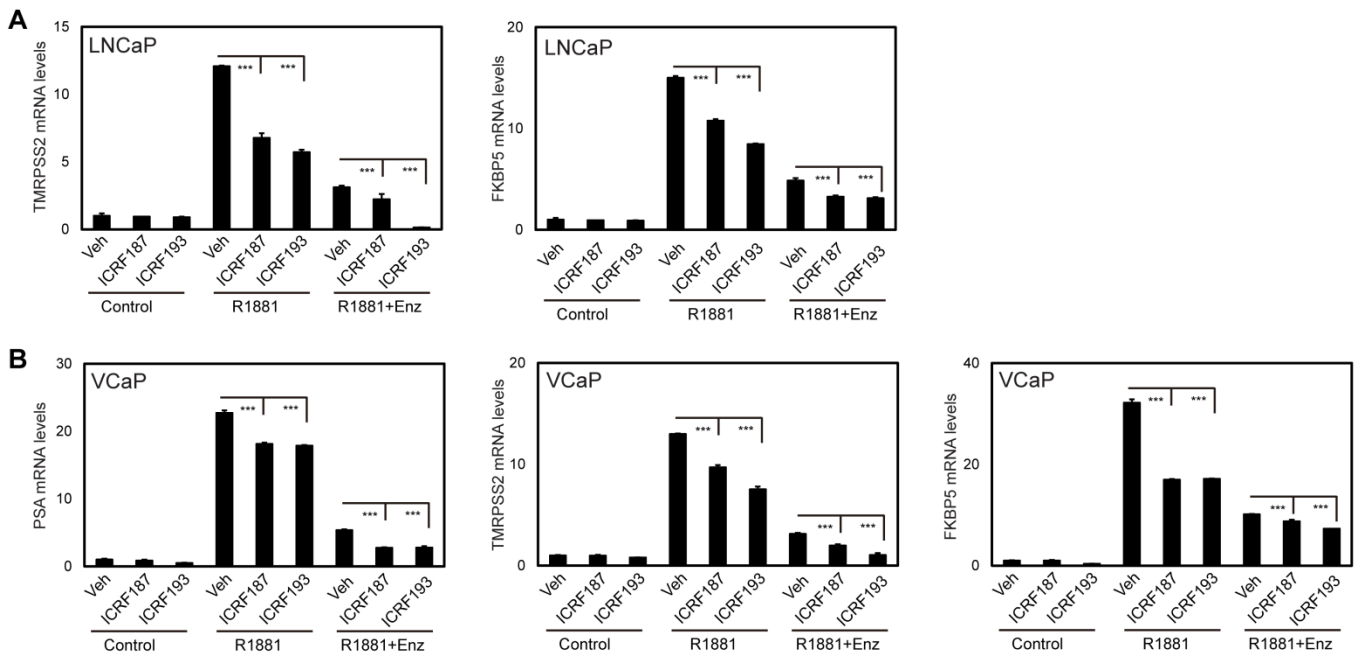

**Figure S2: (A) LNCaP and (B) VCaP cells were cultured in medium containing 5% CSS. Cells were treated with vehicle, 1nM of R1881 or 1nM of R1881 plus 5uM of ENZ for 24 hours. Cells were also co-treated with vehicle, 1uM of ICRF187 or 1uM of ICRF193 as indicated. Relative RNA levels of PSA, TMRPSS2 and FKBP5 to GAPDH were measured by real-time PCR from three independent experiments. Data represent mean  $\pm$  SEM (n=3) with  $P < 0.01$  as \*\* and  $P < 0.001$  as \*\*\* (student's t-test).**

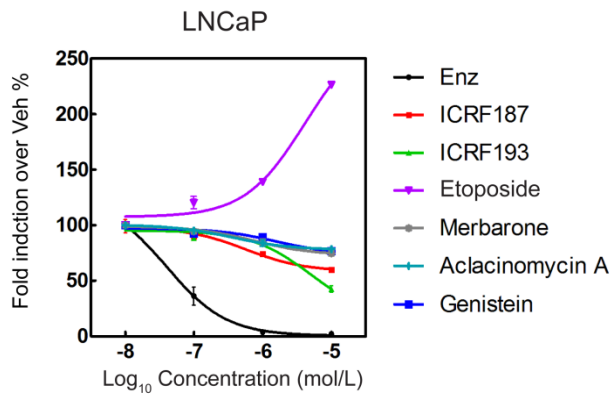

**Figure S3:** LNCaP cells were transfected with a PSA-luciferase reporter and treated with 1nM of R1881. Cells were also treated with vehicle or 0.01-10uM of ENZ, ICRF187, ICRF193, Etoposide, Merbarone, Aclacinomycin A or Genistein for 24 hours. Relative luciferase activities were calibrated with Renilla from three independent experiments and were presented as mean  $\pm$  SEM (n=3). Values from vehicle treatment were set as 100%.

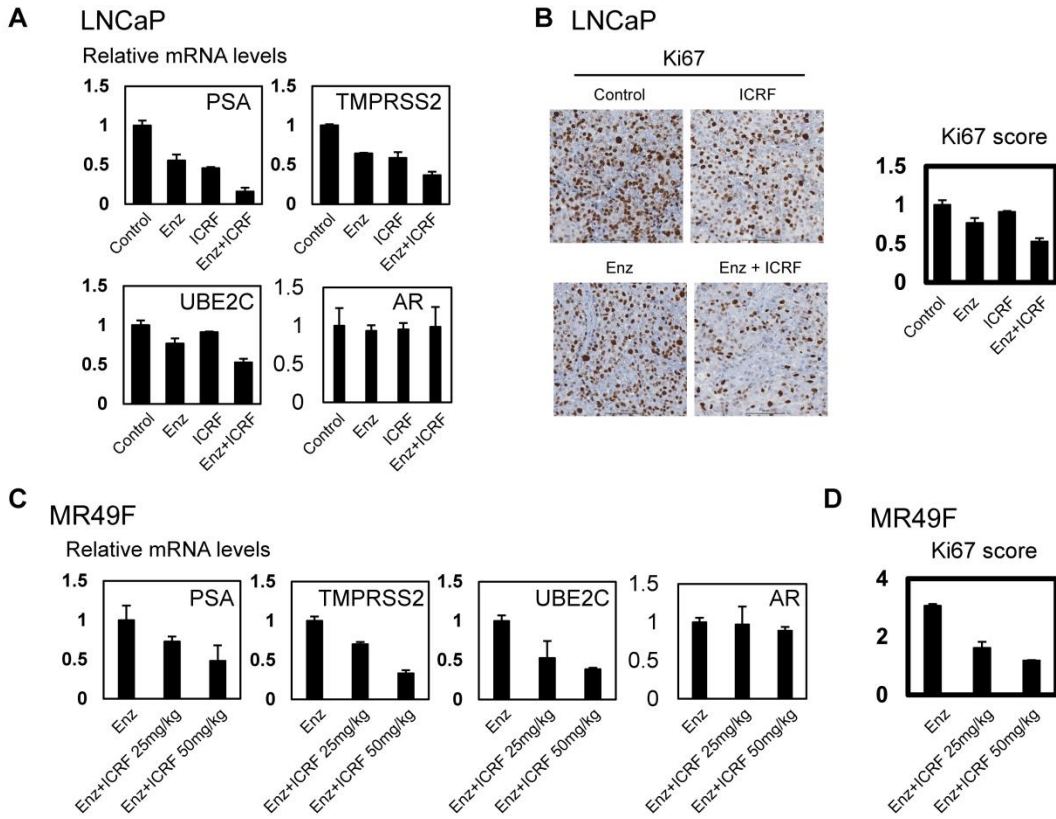

**Figure S4:** (A) PSA, TMPRSS2, UBE2C and AR mRNA levels from CRPC LNCaP xenografts treated with ENZ and or ICRF187 were measured by real-time PCR. (B) Ki67 histology score was determined. (C) PSA, TMPRSS2, UBE2C and AR mRNA levels from ENZ-resistant MR49F xenografts treated with ENZ and or ICRF187 were measured by real-time PCR. (D) Ki67 histology score was determined.

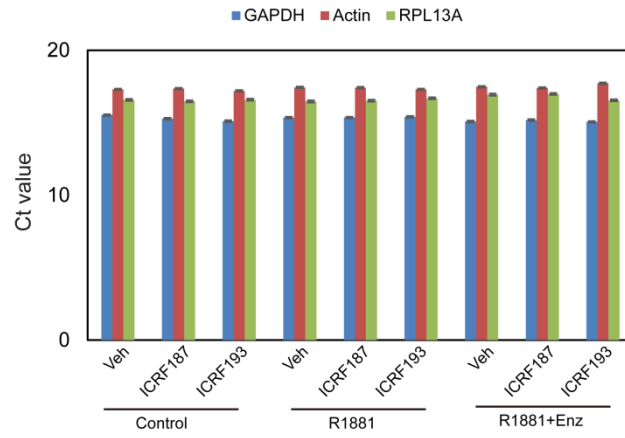

**Figure S5:** LNCaP cells were cultured in medium containing 5% CSS. Cells were treated with vehicle, 1nM of R1881 or 1nM of R1881 plus 5uM of ENZ for 24 hours. Cells were also co-treated with vehicle, 1uM of ICRF187 or 1uM of ICRF193 as indicated. Ct values of GAPDH, beta actin and RPL13A were measured by real-time PCR.

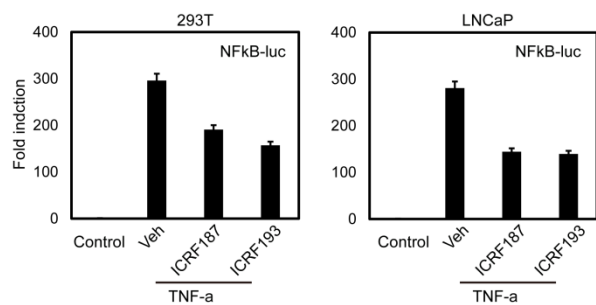

**Figure S6:** (A) 293T and (B) LNCaP cells were transiently transfected with an NFkB-luciferase reporter (Invitrogen). Cells were then treated with either vehicle, 100ng/ml TNFa, 100ng/ml TNFa plus 10uM of ICRF187 or 100ng/ml TNF-a plus 2uM of ICRF193 for 6 hours. Luciferase activities were calibrated with Renilla from three independent experiments and presented as mean  $\pm$  SEM (n=3). Values from vehicle treatment were set as 1.

**A** Cell population distribution without synchronization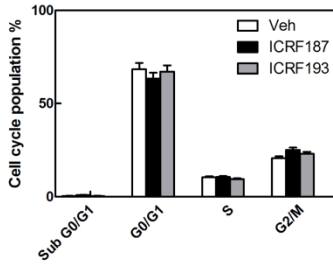**B**

| LNCaP        | G0/G1     | G2/M      |
|--------------|-----------|-----------|
| Serum Starve | 87.6±3.8% | 4.5±2.3%  |
| Nocodazole   | 21.0±3.8% | 61.2±4.3% |

  

| LNCaP95      | G0/G1       | G2/M      |
|--------------|-------------|-----------|
| Serum Starve | 80.2±5.8%   | 10.8±3.3% |
| Nocodazole   | 26.7.0±4.8% | 50.4±6.3% |

**Figure S7:** (A) none synchronised LNCaP cells were treated with vehicle, 10uM of ICRF187 or 2uM of ICRF193 and used to perform FACS assays to determine cell populations at G0/G1, S and G2/M phases. (B) Cell cycling were synchronized by either serum starve or nocodazole as described in material and method section. Cell populations at G0/G1 and G2/M phases were measured by FACS assays.

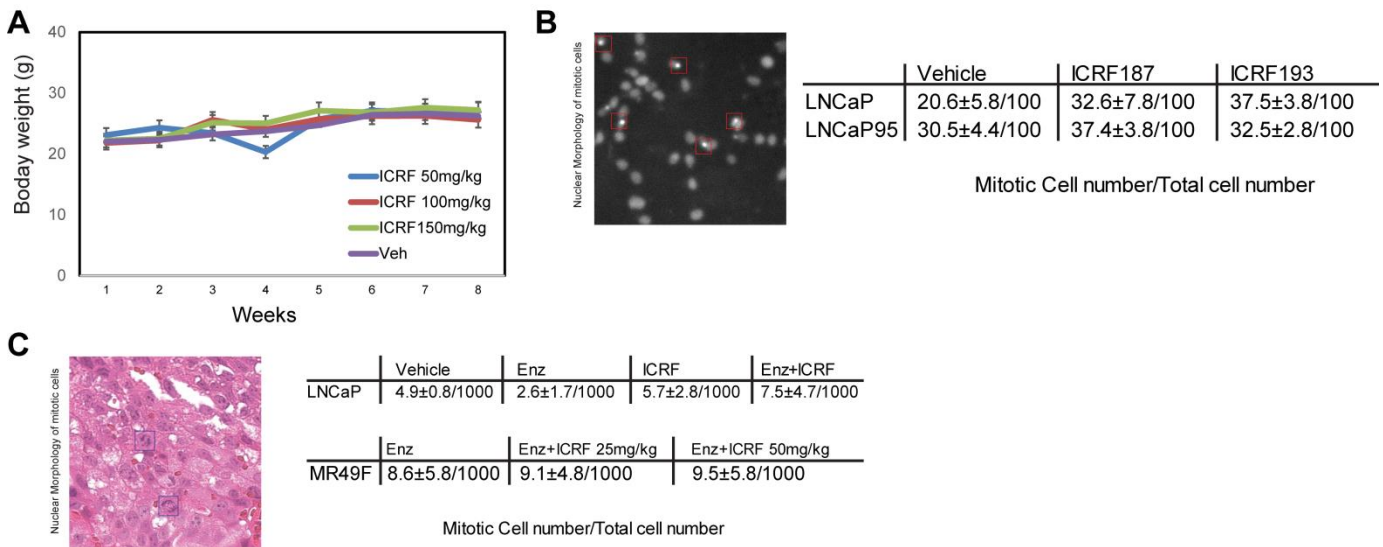

**Figure S8:** (A) Male nude mice were treated with vehicle, 50mg/kg ICRF187, 100mg/kg ICRF187 or 150mg/kg ICRF187 (n=5/group) for 2 months. Body weight was measured weekly. Data was shown as mean  $\pm$  SEM (n=5). (B) LNCaP and LNCaP95 cell cycling were synchronized by nocodazole and released for 1.5 hours for LNCaP cells and 2 hours for LNCaP95 cells as described in figure 4C. Cells were fixed by 4% PFA and stained with DAPI. None overlapping fields (n=10) under 400X magnification were selected to count mitotic cell numbers. (C) LNCaP and MR49F xenografts from Figure 5 were stained with H&E. Five none overlapping fields from each tumor slide under 400X magnification were selected. Total cell numbers and mitotic cell numbers were counted manually with a mechanical tabulator.



## Supplementary table

### Real-time qPCR primers:

|            |                                   |
|------------|-----------------------------------|
| Topo IIb F | 5'-AGC CAT TGA CGC AGT TCA TGT-3' |
| Topo IIb R | 5'-CCT GGC ACA AAG GTA ACC TCC-3' |
| GAPDH F    | 5'-GGACCTGACCTGCCGTCTAGAA-3'      |
| GAPDH R    | 5'-GGTGTCTGCTGTTGAAGTCAGAG-3'     |
| PSA F      | 5'-AGTGCAGAGAAGCATTCCCAAC-3'      |
| PSA R      | 5'-CCAGCAAGATCACGCTTTTGT T-3'     |
| TMPSS2F    | 5'-CAGGAGTGTACGGGAATGTGATGGT-3'   |
| TMPSS2 R   | 5'-GATTAGCCGTCTGCCCTCATTGT-3'     |
| UBE2C F    | 5' AGT GGC TAC CCT TAC AAT GCG 3' |
| UBE2C R    | 5' TTA CCC TGG GTG TCC ACG TT 3'  |
| ACTIN F    | 5'-GGA CTT CGA GCA AGA GAT GG -3' |
| ACTIN R    | 5'-AGC ACT GTG TTG GCG TAC AG -3' |
| FKBP5 F    | 5'-AATGGTGAGGAAACGCCGATG -3'      |
| FKBP5 R    | 5'-TCGAGGGAATTTTAGGGAGACT -3'     |
| AR F       | 5'-CCAGGGACCATGTTTTGCC -3'        |
| AR R       | 5'-CGAAGACGACAAGATGGACAA -3'      |
| RPL13A F   | 5'-GCCATCGTGGCTAAACAGGTA -3'      |
| RPL13A R   | 5'-GTTGGTGTTTCATCCGCTTGC -3'      |

### siRNA:

| siRNA    | Supplier and Cat No. |
|----------|----------------------|
| Control  | Santa Cruz sc-37007  |
| Topo IIb | Santa Cruz sc-36697  |

### Primers for site-directed mutagenesis for AR

|                  |                                                       |
|------------------|-------------------------------------------------------|
| AR F876L F       | 5'-CGA GAG AGC TGC ATC AGT TAA CTT TTG-3'             |
| AR F876L R       | 5'-AGC AGG TCA AAA GTT AAC TGA TGC AG-3'              |
| AR F876L/T877A F | 5'-CAG CTC GCT TTT GAC CTG CTA ATC AAG TCA CAC ATG-3' |
| AR F876L/T877A R | 5'-ATG CAG CTC TCT CGC AAT AGG CTG CAC GGA G-3'       |
| AR W741C F       | 5'-TCC TGC ATG GGG CTC ATG GTG TTT GCC ATG GGC TGG-3' |
| AR W741C R       | 5'-GTA CTG AAT GAC AGC CAT CTG GTC GTC CAC-3'         |

### CHIP Primers:

|                |                                         |
|----------------|-----------------------------------------|
| PSA enhancer F | 5'-TGG GAC AAC TTG CAA ACC TG-3'        |
| PSA enhancer R | 5'-CCA GAG TAG GTC TGT TTT CAA TCC A-3' |
| TMPRSS2 F      | 5'-TGG TCC TGG ATG ATA AAA AAA GTT T-3' |
| TMPRSS2 R      | 5'-GAC ATA CGC CCC ACA ACA GA-3'        |

## Antibody Information

| Antibody        | Clone ID | Cat No.  | Supplier           |
|-----------------|----------|----------|--------------------|
| AR              | N-20     | sc-816   | Santa Cruz Biotech |
| AR-V7           |          | AG10008  | Precision Antibody |
| Actin           |          | A2066    | Sigma              |
| Tubulin         | 11H10    | #2125    | Cell Signaling     |
| Histone H3      |          | Ab1791   | Abcam              |
| Topo II $\beta$ | H-286    | sc-13059 | Santa Cruz Biotech |
